# Supplementary material for: A new enzymatic assay to quantify inorganic pyrophosphate in plasma
Source: bioRxiv or medRxiv preprint supplement (doi:10.1101/2022.05.29.22275726), 2022-05-29

# Supplemental Figure 1

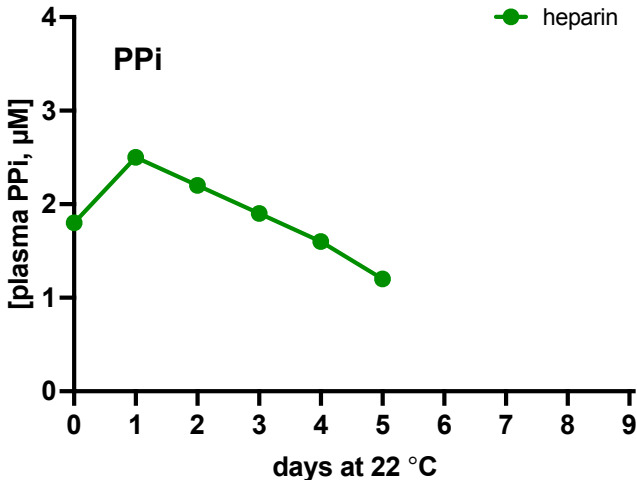

Supplement: Supplementary file [file media-1.pdf]
